# Supplementary material
Source: Springer Nature journal article supplement (https://www.springermedizin.de/resource/supplementary/12967_2008_278_MOESM7_ESM.pdf/9576090)
Supplement: MOESM7 [file 9576090]

### Additional File 7:List of genes differentially expressed among Prakriti types

| S.No | Gender | Profile | Acc      | Symbol    | Name                                                                                                         | HUB genes | Housekeeping | Disease_OMIM            | Disease_GAD                                                    |
|------|--------|---------|----------|-----------|--------------------------------------------------------------------------------------------------------------|-----------|--------------|-------------------------|----------------------------------------------------------------|
| 1    | Female | V-K+P+  | T94105   | ABCC1     | ATP-binding cassette, sub-family C (CFTR/MRP), member 1                                                      |           |              | Earwax wet/dry          | Cancer,Cardiovascular,Immune,Metabolic,Psychiatric             |
| 2    | Female | V-K-P+  | BG750060 | AGBL5     | ATP/GTP binding protein-like 5                                                                               |           |              |                         |                                                                |
| 3    | Female | V+K-P-  | H64609   | AHR       | Aryl hydrocarbon receptor                                                                                    | HUB       |              |                         | Cancer,Developmental,Metabolic,Psychiatric,ReProduction,Vision |
| 4    | Female | V+K+P-  | AA020896 | ANKRD53   | Ankyrin repeat domain 53                                                                                     |           |              |                         |                                                                |
| 5    | Female | V+K-P+  | N94268   | ANPEP     | Alanyl (membrane) aminopeptidase (aminopeptidase N, aminopeptidase M, microsomal aminopeptidase, CD13, p150) |           |              |                         | Immune,Normal Variation                                        |
| 6    | Female | V+K-P-  | BG387747 | API5      | Apoptosis inhibitor 5                                                                                        |           | Housekeeping |                         |                                                                |
| 7    | Female | V+K-P+  | H95186   | ARL16     | ADP-ribosylation factor-like 16                                                                              |           |              |                         |                                                                |
| 8    | Female | V-K+P+  | CX166694 | ARL6IP6   | ADP-ribosylation-like factor 6 interacting protein 6                                                         |           |              |                         |                                                                |
| 9    | Female | V-K+P-  | BM918995 | ATP5G2    | ATP synthase, H+ transporting, mitochondrial F0 complex, subunit C2 (subunit 9)                              |           |              |                         |                                                                |
| 10   | Female | V+K-P+  | AA053325 | ATP6V1G1  | ATPase, H+ transporting, lysosomal 13kDa, V1 subunit G1                                                      |           | Housekeeping |                         |                                                                |
| 11   | Female | V+K-P+  | T97408   | BAG1      | BCL2-associated athanogene                                                                                   | HUB       |              |                         | Neurological                                                   |
| 12   | Female | V+K-P+  | N93740   | BBS2      | Bardet-Biedl syndrome 2                                                                                      |           |              | Bardet-Biedl syndrome 2 |                                                                |
| 13   | Female | V+K+P-  | BM992552 | BIVM      | Basic, immunoglobulin-like variable motif containing                                                         |           |              |                         |                                                                |
| 14   | Female | V+K-P-  | R89879   | C10orf65  | Chromosome 10 open reading frame 65                                                                          |           |              |                         |                                                                |
| 15   | Female | V-K+P+  | R69813   | C11orf49  | Chromosome 11 open reading frame 49                                                                          |           |              |                         |                                                                |
| 16   | Female | V+K-P+  | N99693   | C12orf32  | Chromosome 12 open reading frame 32                                                                          |           |              |                         |                                                                |
| 17   | Female | V+K-P+  | N93440   | C1orf38   | Chromosome 1 open reading frame 38                                                                           |           |              |                         |                                                                |
| 18   | Female | V-K+P+  | W02372   | C20orf175 | Chromosome 20 open reading frame 175                                                                         |           |              |                         |                                                                |
| 19   | Female | V-K-P+  | T48696   | C5orf32   | Chromosome 5 open reading frame 32                                                                           |           |              |                         |                                                                |
| 20   | Female | V+K+P-  | BM920182 | C9orf16   | Chromosome 9 open reading frame 16                                                                           |           | Housekeeping |                         |                                                                |
| 21   | Female | V+K-P+  | H07996   | C9orf91   | Chromosome 9 open reading frame 91                                                                           |           |              |                         |                                                                |

| S.No | Gender | Profile | Acc      | Symbol      | Name                                                                         | HUB genes | Housekeeping | Disease_OMIM                                                                                                 | Disease_GAD                               |
|------|--------|---------|----------|-------------|------------------------------------------------------------------------------|-----------|--------------|--------------------------------------------------------------------------------------------------------------|-------------------------------------------|
| 22   | Female | V+K+P-  | AL120360 | CAMK2B      | Calcium/calmodulin-dependent protein kinase (CaM kinase) II beta             | HUB       |              |                                                                                                              |                                           |
| 23   | Female | V-K+P-  | BM924711 | CD14        | CD14 molecule                                                                |           |              |                                                                                                              |                                           |
| 24   | Female | V-K+P-  | N24337   | CD44        | CD44 molecule (Indian blood group)                                           | HUB       |              | Blood group                                                                                                  | Immune                                    |
| 25   | Female | V-K+P-  | N24337   | CD44        | CD44 molecule (Indian blood group)                                           | HUB       |              | Blood group                                                                                                  | Immune                                    |
| 26   | Female | V+K+P+  | N91433   | CFH         | Complement factor H                                                          |           |              | Factor H and factor H-like 1 (3), Hemolytic-uremic syndrome, Nephropathy, Macular degeneration age-related 1 | Cardiovascular, Immune, Metabolic, Vision |
| 27   | Female | V-K+P-  | N45640   | CH25H       | Cholesterol 25-hydroxylase                                                   |           |              |                                                                                                              |                                           |
| 28   | Female | V-K+P+  | BQ063705 | CHCHD2      | Coiled-coil-helix-coiled-coil-helix domain containing 2                      |           |              |                                                                                                              |                                           |
| 29   | Female | V+K-P-  | R00682   | CLEC2D      | C-type lectin domain family 2, member D                                      |           |              |                                                                                                              |                                           |
| 30   | Female | V-K+P-  | N53883   | DCUN1D4     | DCN1, defective in cullin neddylation 1, domain containing 4 (S. cerevisiae) |           |              |                                                                                                              |                                           |
| 31   | Female | V+K-P-  | AA393337 | KFZP564O05  | Hypothetical protein DKFZp564O0523                                           | HUB       |              |                                                                                                              |                                           |
| 32   | Female | V+K-P-  | AA393337 | KFZP564O05  | Hypothetical protein DKFZp564O0523                                           | HUB       |              |                                                                                                              |                                           |
| 33   | Female | V+K-P-  | BM821533 | KFZp686L141 | Hypothetical gene supported by BX538329                                      |           |              |                                                                                                              |                                           |
| 34   | Female | V-K+P+  | H89551   | DSG2        | Desmoglein 2                                                                 |           |              |                                                                                                              |                                           |
| 35   | Female | V+K+P-  | R14533   | FLJ35220    | Hypothetical protein FLJ35220                                                |           |              |                                                                                                              |                                           |
| 36   | Female | V+K-P-  | N92106   | FYB         | FYN binding protein (FYB-120/130)                                            | HUB       |              |                                                                                                              |                                           |
| 37   | Female | V+K-P-  | AA043597 | GALNACT-2   | Chondroitin sulfate GalNAcT-2                                                |           |              |                                                                                                              |                                           |
| 38   | Female | V+K+P+  | H60117   | HEL308      | DNA helicase HEL308                                                          |           |              |                                                                                                              |                                           |
| 39   | Female | V+K+P-  | AA011481 | HIST2H2BE   | Histone cluster 2, H2be                                                      | HUB       |              |                                                                                                              |                                           |
| 40   | Female | V+K-P-  | H62639   | HSPA8       | Heat shock 70kDa protein 8                                                   | HUB       | Housekeeping |                                                                                                              | Cancer, Renal                             |
| 41   | Female | V-K+P-  | R09292   | IFIT1L      | Interferon-induced protein with tetratricopeptide repeats 1-like             |           |              |                                                                                                              |                                           |
| 42   | Female | V+K-P-  | N63988   | IFIT2       | Interferon-induced protein with tetratricopeptide repeats 2                  |           |              |                                                                                                              |                                           |
| 43   | Female | V-K+P+  | T77339   | IL15RA      | Interleukin 15 receptor, alpha                                               |           |              |                                                                                                              |                                           |

| S.No | Gender | Profile | Acc      | Symbol    | Name                                                                          | HUB genes | Housekeeping | Disease_OMIM                                                                                                            | Disease_GAD                             |
|------|--------|---------|----------|-----------|-------------------------------------------------------------------------------|-----------|--------------|-------------------------------------------------------------------------------------------------------------------------|-----------------------------------------|
| 44   | Female | V-K-P+  | AW051744 | IL1R2     | Interleukin 1 receptor, type II                                               |           |              |                                                                                                                         | Immune,Infection,Neurological           |
| 45   | Female | V+K+P-  | W88639   | ILK       | Integrin-linked kinase                                                        | HUB       | Housekeeping |                                                                                                                         |                                         |
| 46   | Female | V+K-P+  | H03917   | INSR      | Insulin receptor                                                              | HUB       |              | Diabetes mellitus insulin-resistant,Leprechaunism,Rabson-Mendenhall syndrome                                            | Aging,Cardiovascular,Immune,Metabolic** |
| 47   | Female | V+K-P-  | H18190   | JAK1      | Janus kinase 1 (a protein tyrosine kinase)                                    | HUB       | Housekeeping |                                                                                                                         | Infection                               |
| 48   | Female | V-K-P+  | T89217   | JAM2      | Junctional adhesion molecule 2                                                |           |              |                                                                                                                         |                                         |
| 49   | Female | V-K+P-  | BQ423875 | KRAS      | V-Ki-ras2 Kirsten rat sarcoma viral oncogene homolog                          | HUB       |              | Bladder Cancer,Breast Cancer somatic,Leukemia,Lung Cancer,Noonan syndrome 3,Pancreatic carcinoma somatic,Stomach Cancer | Cancer*                                 |
| 50   | Female | V+K-P+  | BI116740 | LOC126075 | Hypothetical protein LOC126075                                                |           |              |                                                                                                                         |                                         |
| 51   | Female | V+K-P-  | H26642   | LOC440498 | Hypothetical gene supported by AK001829                                       |           |              |                                                                                                                         |                                         |
| 52   | Female | V-K+P-  | BF194709 | LOC646324 | Hypothetical LOC646324                                                        |           |              |                                                                                                                         |                                         |
| 53   | Female | V+K-P+  | AA044796 | LOC729096 | Similar to BMS1-like, ribosome assembly protein                               |           |              |                                                                                                                         |                                         |
| 54   | Female | V+K-P-  | AA040149 | LOC730092 | RRN3 RNA polymerase I transcription factor homolog (S. cerevisiae) pseudogene |           |              |                                                                                                                         |                                         |
| 55   | Female | V+K-P-  | N20577   | LRR57     | Leucine rich repeat containing 57                                             |           |              |                                                                                                                         |                                         |
| 56   | Female | V+K-P+  | AI096627 | LRR8A     | Leucine rich repeat containing 8 family, member A                             |           |              |                                                                                                                         |                                         |
| 57   | Female | V-K+P-  | N72242   | LRRFIP1   | Leucine rich repeat (in FLII) interacting protein 1                           |           |              |                                                                                                                         |                                         |
| 58   | Female | V-K-P+  | W81346   | MGAT1     | Mannosyl (alpha-1,3-)-glycoprotein beta-1,2-N-acetylglucosaminyltransferase   |           | Housekeeping |                                                                                                                         |                                         |
| 59   | Female | V+K-P+  | R69953   | MRPL19    | Mitochondrial ribosomal protein L19                                           |           |              |                                                                                                                         |                                         |

| S.No | Gender | Profile | Acc      | Symbol | Name                                                                            | HUB genes | Housekeeping | Disease_OMIM                                                                                                                                                                                                                                                                                                                                                                                | Disease_GAD                       |
|------|--------|---------|----------|--------|---------------------------------------------------------------------------------|-----------|--------------|---------------------------------------------------------------------------------------------------------------------------------------------------------------------------------------------------------------------------------------------------------------------------------------------------------------------------------------------------------------------------------------------|-----------------------------------|
| 60   | Female | V-K+P-  | N57349   | MRPL19 | Mitochondrial ribosomal protein L19                                             |           |              |                                                                                                                                                                                                                                                                                                                                                                                             |                                   |
| 61   | Female | V+K+P-  | H10110   | MRV11  | Murine retrovirus integration site 1 homolog                                    |           |              |                                                                                                                                                                                                                                                                                                                                                                                             |                                   |
| 62   | Female | V-K-P+  | AA043650 | MYD88  | Myeloid differentiation primary response gene (88)                              | HUB       |              |                                                                                                                                                                                                                                                                                                                                                                                             |                                   |
| 63   | Female | V-K+P+  | N31362   | NF1    | Neurofibromin 1 (neurofibromatosis, von Recklinghausen disease, Watson disease) |           |              | Hepatic adenoma,Leukemia acute promyelocytic,L eukemia juvenile myelomonocytic ,MODY type III,Melanoma,Neurofibromatosis familial spinal,Neurofibromatosis,Neurofibromatosis-Noonan syndrome,Neutropenia severe congenital,Sertoli-cell-only syndrome,Stem-cell leukemia/lymphoma syndrome (3),Watson syndrome,Diabetes mellitus insulin-dependent,Diabetes mellitus noninsulin-dependent 2 | Cancer,Cardiovascular,Psychiatric |
| 64   | Female | V-K+P-  | W68069   | NGFR   | Nerve growth factor receptor (TNFR superfamily, member 16)                      | HUB       |              |                                                                                                                                                                                                                                                                                                                                                                                             | Psychiatric                       |
| 65   | Female | V+K-P-  | AA149225 | OSTF1  | Osteoclast stimulating factor 1                                                 |           |              |                                                                                                                                                                                                                                                                                                                                                                                             |                                   |
| 66   | Female | V-K+P-  | AA128349 | PCBP1  | Poly(rC) binding protein 1                                                      | HUB       |              |                                                                                                                                                                                                                                                                                                                                                                                             |                                   |
| 67   | Female | V+K-P+  | N72922   | PDLIM5 | PDZ and LIM domain 5                                                            |           |              |                                                                                                                                                                                                                                                                                                                                                                                             | Psychiatric                       |
| 68   | Female | V+K-P+  | AA233704 | PIGT   | Phosphatidylinositol glycan anchor biosynthesis, class T                        |           |              |                                                                                                                                                                                                                                                                                                                                                                                             |                                   |

| S.No | Gender | Profile | Acc      | Symbol | Name                                                  | HUB genes | Housekeeping | Disease_OMIM                                                                                                                                | Disease_GAD                                |
|------|--------|---------|----------|--------|-------------------------------------------------------|-----------|--------------|---------------------------------------------------------------------------------------------------------------------------------------------|--------------------------------------------|
| 69   | Female | V-K+P-  | BM477140 | PLEK   | Pleckstrin                                            |           |              | Spinocerebellar ataxia 4 pure Japanese type, Age-related maculopathy susceptibility to                                                      |                                            |
| 70   | Female | V-K+P+  | H50917   | PRIMA1 | Proline rich membrane anchor 1                        |           |              |                                                                                                                                             |                                            |
| 71   | Female | V-K+P+  | AA033953 | PRLR   | Prolactin receptor                                    | HUB       |              |                                                                                                                                             | Cancer, Immune                             |
| 72   | Female | V+K-P+  | R36315   | PTPN12 | Protein tyrosine phosphatase, non-receptor type 12    | HUB       |              | Colon Cancer (3)                                                                                                                            |                                            |
| 73   | Female | V+K-P-  | N72527   | RAD51  | RAD51 homolog (RecA homolog, E. coli) (S. cerevisiae) | HUB       |              | Breast Cancer susceptibility to                                                                                                             | Cancer*                                    |
| 74   | Female | V+K-P-  | AA040825 | RANBP5 | RAN binding protein 5                                 | HUB       |              |                                                                                                                                             |                                            |
| 75   | Female | V+K+P-  | R10548   | RHD    | Rh blood group, D antigen                             |           |              | Rh-negative blood type] (3)                                                                                                                 | Cardiovascular, Hematological, Psychiatric |
| 76   | Female | V+K+P-  | BM009874 | RPL21  | Ribosomal protein L21                                 |           |              |                                                                                                                                             |                                            |
| 77   | Female | V-K+P-  | BQ064037 | RPS3A  | Ribosomal protein S3A                                 | HUB       |              |                                                                                                                                             |                                            |
| 78   | Female | V+K-P+  | H38309   | RUTBC2 | RUN and TBC1 domain containing 2                      |           |              |                                                                                                                                             |                                            |
| 79   | Female | V+K-P-  | AA055241 | S100A3 | S100 calcium binding protein A3                       |           |              |                                                                                                                                             |                                            |
| 80   | Female | V+K+P-  | AA131244 | SAC    | Testicular soluble adenylyl cyclase                   |           |              | Epiphyseal dysplasia multiple 1, Pseudoachondroplasia, Spastic ataxia Charlevoix-Saguenay type, Hypercalciuria absorptive susceptibility to |                                            |
| 81   | Female | V+K-P+  | H03112   | SAT1   | Spermidine/spermine N1-acetyltransferase 1            | HUB       |              |                                                                                                                                             |                                            |
| 82   | Female | V+K+P-  | R83139   | SCFV   | Single-chain Fv fragment                              |           |              |                                                                                                                                             |                                            |
| 83   | Female | V+K-P+  | N99362   | SCML2  | Sex comb on midleg-like 2 (Drosophila)                |           |              |                                                                                                                                             |                                            |
| 84   | Female | V-K-P+  | N29108   | SEC63  | SEC63 homolog (S. cerevisiae)                         |           |              | Polycystic liver disease                                                                                                                    |                                            |

| S.No | Gender | Profile | Acc      | Symbol      | Name                                                                     | HUB genes | Housekeeping | Disease_OMIM                                                                                                                        | Disease_GAD |
|------|--------|---------|----------|-------------|--------------------------------------------------------------------------|-----------|--------------|-------------------------------------------------------------------------------------------------------------------------------------|-------------|
| 85   | Female | V+K-P+  | AA156247 | SERPINB9    | Serpin peptidase inhibitor, clade B (ovalbumin), member 9                | HUB       |              |                                                                                                                                     |             |
| 86   | Female | V-K+P-  | N48735   | SHROOM4     | Shroom family member 4                                                   |           |              |                                                                                                                                     |             |
| 87   | Female | V+K-P+  | H55836   | SLC38A4     | Solute carrier family 38, member 4                                       |           |              |                                                                                                                                     |             |
| 88   | Female | V+K-P+  | N45602   | STK4        | Serine/threonine kinase 4                                                |           |              |                                                                                                                                     |             |
| 89   | Female | V+K+P-  | AA115024 | THRAP6      | Thyroid hormone receptor associated protein 6                            |           |              |                                                                                                                                     |             |
| 90   | Female | V-K+P+  | BM970107 | TXN         | Thioredoxin                                                              | HUB       | Housekeeping | Machado-Joseph disease, Spinocerebellar ataxia-1, Spinocerebellar ataxia-10 (3), Spinocerebellar ataxia-2, Spinocerebellar ataxia-7 |             |
| 91   | Female | V-K+P+  | H89526   | UGT8        | UDP glycosyltransferase 8 (UDP-galactose ceramide galactosyltransferase) |           |              |                                                                                                                                     |             |
| 92   | Female | V-K+P-  | N56656   | USPL1       | Ubiquitin specific peptidase like 1                                      |           |              |                                                                                                                                     |             |
| 93   | Female | V+K-P-  | AW959692 | VEGFC       | Vascular endothelial growth factor C                                     |           |              |                                                                                                                                     |             |
| 94   | Female | V+K-P-  | AA203710 | XPO7        | Exportin 7                                                               |           | Housekeeping |                                                                                                                                     |             |
| 95   | Female | V+K-P+  | T66930   | ZNF552      | Zinc finger protein 552                                                  |           |              |                                                                                                                                     |             |
| 96   | Female | V-K-P+  | H84096   | unannotated |                                                                          |           |              |                                                                                                                                     |             |
| 97   | Female | V+K-P+  | BQ025516 | unannotated |                                                                          |           |              |                                                                                                                                     |             |
| 98   | Female | V+K-P+  | H20874   | unannotated |                                                                          |           |              |                                                                                                                                     |             |
| 99   | Female | V-K+P-  | R18453   | unannotated |                                                                          |           |              |                                                                                                                                     |             |
| 100  | Female | V+K-P+  | T67658   | unannotated |                                                                          |           |              |                                                                                                                                     |             |
| 101  | Female | V+K-P+  | N94272   | unannotated |                                                                          |           |              |                                                                                                                                     |             |
| 102  | Female | V+K-P+  | R96161   | unannotated |                                                                          |           |              |                                                                                                                                     |             |
| 103  | Female | V+K-P+  | H29534   | unannotated |                                                                          |           |              |                                                                                                                                     |             |
| 104  | Female | V-K+P-  | H68035   | unannotated |                                                                          |           |              |                                                                                                                                     |             |
| 105  | Female | V+K+P-  | AA053901 | unannotated |                                                                          |           |              |                                                                                                                                     |             |
| 106  | Female | V+K-P-  | W02639   | unannotated |                                                                          |           |              |                                                                                                                                     |             |
| 107  | Female | V+K-P-  | H29340   | unannotated |                                                                          |           |              |                                                                                                                                     |             |
| 108  | Female | V+K-P-  | H30223   | unannotated |                                                                          |           |              |                                                                                                                                     |             |
| 109  | Female | V-K+P+  | H63707   | unannotated |                                                                          |           |              |                                                                                                                                     |             |
| 110  | Female | V-K+P-  | H51552   | unannotated |                                                                          |           |              |                                                                                                                                     |             |

| S.No | Gender | Profile | Acc      | Symbol      | Name | HUB genes | Housekeeping | Disease_OMIM | Disease_GAD |
|------|--------|---------|----------|-------------|------|-----------|--------------|--------------|-------------|
| 111  | Female | V+K-P+  | T82014   | unannotated |      |           |              |              |             |
| 112  | Female | V-K-P+  | H49130   | unannotated |      |           |              |              |             |
| 113  | Female | V+K-P+  | N80448   | unannotated |      |           |              |              |             |
| 114  | Female | V+K-P+  | H58017   | unannotated |      |           |              |              |             |
| 115  | Female | V+K-P+  | H29067   | unannotated |      |           |              |              |             |
| 116  | Female | V+K-P-  | CR745150 | unannotated |      |           |              |              |             |
| 117  | Female | V+K-P+  | W01982   | unannotated |      |           |              |              |             |
| 118  | Female | V+K-P+  | W87872   | unannotated |      |           |              |              |             |
| 119  | Female | V+K-P+  | H79213   | unannotated |      |           |              |              |             |
| 120  | Female | V+K-P+  | N99795   | unannotated |      |           |              |              |             |
| 121  | Female | V+K-P+  | R33062   | unannotated |      |           |              |              |             |
| 122  | Female | V+K-P-  | T85040   | unannotated |      |           |              |              |             |
| 123  | Female | V-K-P+  | W31733   | unannotated |      |           |              |              |             |
| 124  | Female | V+K-P-  | R50526   | unannotated |      |           |              |              |             |
| 125  | Female | V+K-P+  | W01596   | unannotated |      |           |              |              |             |
| 126  | Female | V+K-P+  | BX102165 | unannotated |      |           |              |              |             |
| 127  | Female | V+K-P+  | BF982646 | unannotated |      |           |              |              |             |
| 128  | Female | V+K-P+  | N34765   | unannotated |      |           |              |              |             |
| 129  | Female | V+K-P+  | N99429   | unannotated |      |           |              |              |             |
| 130  | Female | V+K-P+  | R26325   | unannotated |      |           |              |              |             |
| 131  | Female | V+K-P+  | N73624   | unannotated |      |           |              |              |             |
| 132  | Female | V+K-P+  | AI357692 | unannotated |      |           |              |              |             |
| 133  | Female | V+K-P+  | H53253   | unannotated |      |           |              |              |             |
| 134  | Female | V+K+P-  | R11292   | unannotated |      |           |              |              |             |
| 135  | Female | V+K-P+  | H87074   | unannotated |      |           |              |              |             |
| 136  | Female | V+K-P+  | N57713   | unannotated |      |           |              |              |             |
| 137  | Female | V+K-P-  | CR739860 | unannotated |      |           |              |              |             |
| 138  | Female | V+K-P+  | T84199   | unannotated |      |           |              |              |             |
| 139  | Female | V+K+P-  | N92095   | unannotated |      |           |              |              |             |
| 140  | Female | V+K-P+  | R36342   | unannotated |      |           |              |              |             |
| 141  | Female | V+K-P+  | R87818   | unannotated |      |           |              |              |             |
| 142  | Female | V-K+P-  | AA203127 | unannotated |      |           |              |              |             |
| 143  | Female | V+K+P-  | H91361   | unannotated |      |           |              |              |             |
| 144  | Female | V+K-P+  | AW959279 | unannotated |      |           |              |              |             |
| 145  | Female | V+K-P+  | AA005396 | unannotated |      |           |              |              |             |
| 146  | Female | V+K-P-  | BX500906 | unannotated |      |           |              |              |             |
| 147  | Female | V+K-P-  | H47541   | unannotated |      |           |              |              |             |
| 148  | Female | V+K-P+  | T78481   | unannotated |      |           |              |              |             |
| 149  | Female | V-K+P-  | H91306   | unannotated |      |           |              |              |             |
| 150  | Female | V+K-P+  | H80655   | unannotated |      |           |              |              |             |

| S.No | Gender | Profile | Acc      | Symbol      | Name                                | HUB genes | Housekeeping | Disease_OMIM                    | Disease_GAD |
|------|--------|---------|----------|-------------|-------------------------------------|-----------|--------------|---------------------------------|-------------|
| 151  | Female | V+K+P-  | W31740   | unannotated |                                     |           |              |                                 |             |
| 152  | Female | V-K+P-  | H47701   | unannotated |                                     |           |              |                                 |             |
| 153  | Female | V+K-P-  | N50668   | unannotated |                                     |           |              |                                 |             |
| 154  | Female | V+K-P+  | R09418   | unannotated |                                     |           |              |                                 |             |
| 155  | Female | V-K-P+  | R71560   | unannotated |                                     |           |              |                                 |             |
| 156  | Female | V+K-P-  | AA031783 | unannotated |                                     |           |              |                                 |             |
| 157  | Female | V+K-P+  | R32718   | unannotated |                                     |           |              |                                 |             |
| 158  | Female | V+K-P+  | AA203154 | unannotated |                                     |           |              |                                 |             |
| 159  | Female | V-K-P+  | T75253   | unannotated |                                     |           |              |                                 |             |
| 160  | Female | V+K-P+  | BM990616 | unannotated |                                     |           |              |                                 |             |
| 161  | Female | V-K+P-  | AA044889 | unannotated |                                     |           |              |                                 |             |
| 162  | Female | V+K-P+  | BG678236 | unannotated |                                     |           |              |                                 |             |
| 163  | Female | V+K-P+  | H72480   | unannotated |                                     |           |              |                                 |             |
| 164  | Female | V+K-P+  | T84203   | unannotated |                                     |           |              |                                 |             |
| 165  | Female | V+K-P-  | N38787   | unannotated |                                     |           |              |                                 |             |
| 166  | Female | V-K-P+  | H49610   | unannotated |                                     |           |              |                                 |             |
| 167  | Female | V-K+P-  | AA040696 | unannotated |                                     |           |              |                                 |             |
| 168  | Female | V-K-P+  | H89206   | unannotated |                                     |           |              |                                 |             |
| 169  | Female | V+K-P+  | AA131265 | unannotated |                                     |           |              |                                 |             |
| 170  | Female | V+K-P-  | AA101823 | unannotated |                                     |           |              |                                 |             |
| 171  | Female | V+K-P+  | H77714   | unannotated |                                     |           |              |                                 |             |
| 172  | Female | V+K+P-  | R86045   | unannotated |                                     |           |              |                                 |             |
| 173  | Female | V+K-P-  | N33616   | unannotated |                                     |           |              |                                 |             |
| 174  | Female | V+K-P+  | H64449   | unannotated |                                     |           |              |                                 |             |
| 175  | Female | V-K+P+  | H73186   | unannotated |                                     |           |              |                                 |             |
| 176  | Female | V-K-P+  | H86214   | unannotated |                                     |           |              |                                 |             |
| 177  | Female | V+K-P+  | H55914   | unannotated |                                     |           |              |                                 |             |
| 178  | Female | V+K-P+  | BX114578 | unannotated |                                     |           |              |                                 |             |
| 179  | Female | V+K-P+  | H77714   | unannotated |                                     |           |              |                                 |             |
| 180  | Female | V+K-P+  | N80982   | unannotated |                                     |           |              |                                 |             |
| 181  | Female | V+K-P-  | AA210886 | unannotated |                                     |           |              |                                 |             |
| 182  | Female | V-K+P+  | AA213442 | unannotated |                                     |           |              |                                 |             |
| 183  | Female | V+K-P+  | H60107   | unannotated |                                     |           |              |                                 |             |
| 184  | Female | V+K-P+  | H78546   | unannotated |                                     |           |              |                                 |             |
| 185  | Male   | V+K-P+  | H48691   | AASS        | Amino adipate-semialdehyde synthase |           |              | Hyperlysinemia, Saccharopinuria |             |
| 186  | Male   | V-K+P+  | BE835258 | ADAMTSL4    | ADAMTS-like 4                       | HUB       |              |                                 |             |
| 187  | Male   | V+K-P+  | H58086   | ADCY7       | Adenylate cyclase 7                 |           |              |                                 |             |



| S.No | Gender | Profile | Acc      | Symbol | Name                                                                    | HUB genes | Housekeeping | Disease_OMIM                                                                                                                                                                                                                                                                                                                                                              | Disease_GAD                 |
|------|--------|---------|----------|--------|-------------------------------------------------------------------------|-----------|--------------|---------------------------------------------------------------------------------------------------------------------------------------------------------------------------------------------------------------------------------------------------------------------------------------------------------------------------------------------------------------------------|-----------------------------|
|      |        |         |          |        |                                                                         |           |              | Acyl-CoA dehydrogenase medium chain deficiency of, Cowchock syndrome (2), Glomerulocystic kidney disease with hyperuricemia and isosthenuria, Hyperuricemic nephropathy familial juvenile, Kallmann syndrome (3), Macular dystrophy autosomal dominant chromosome 6-linked, Medullary cystic kidney disease 2 (2), Medullary cystic kidney disease 2, Stargardt disease 3 |                             |
| 188  | Male   | V-K+P+  | W25455   | ADM    | Adrenomedullin                                                          |           |              |                                                                                                                                                                                                                                                                                                                                                                           | Cardiovascular, Metabolic   |
| 189  | Male   | V+K-P-  | R84726   | ADORA1 | Adenosine A1 receptor                                                   |           |              |                                                                                                                                                                                                                                                                                                                                                                           | Cardiovascular, Psychiatric |
| 190  | Male   | V-K+P-  | BG750060 | AGBL5  | ATP/GTP binding protein-like 5                                          |           |              |                                                                                                                                                                                                                                                                                                                                                                           |                             |
| 191  | Male   | V+K+P-  | BM561545 | AHCTF1 | AT hook containing transcription factor 1                               |           |              |                                                                                                                                                                                                                                                                                                                                                                           |                             |
| 192  | Male   | V+K-P+  | AA036635 | AKAP10 | A kinase (PRKA) anchor protein 10                                       |           |              | Longevity reduced                                                                                                                                                                                                                                                                                                                                                         | Cardiovascular              |
| 193  | Male   | V-K+P-  | AV747676 | AKT3   | V-akt murine thymoma viral oncogene homolog 3 (protein kinase B, gamma) |           |              |                                                                                                                                                                                                                                                                                                                                                                           |                             |

| S.No | Gender | Profile | Acc      | Symbol    | Name                                                                    | HUB genes | Housekeeping | Disease_OMIM                                    | Disease_GAD            |
|------|--------|---------|----------|-----------|-------------------------------------------------------------------------|-----------|--------------|-------------------------------------------------|------------------------|
| 194  | Male   | V+K-P-  | N42072   | ALOX5AP   | Arachidonate 5-lipoxygenase-activating protein                          |           |              | Myocardial infarction, Stroke susceptibility to | Cardiovascular, Immune |
| 195  | Male   | V-K+P+  | W05331   | AMZ2      | Archaemetzincins-2                                                      |           |              |                                                 |                        |
| 196  | Male   | V-K+P-  | BG546113 | ARTS-1    | Type 1 tumor necrosis factor receptor shedding aminopeptidase regulator |           |              |                                                 | Cardiovascular         |
| 197  | Male   | V+K+P+  | N35460   | ASH1L     | Ash1 (absent, small, or homeotic)-like (Drosophila)                     |           |              |                                                 |                        |
| 198  | Male   | V+K+P+  | W58264   | ATP6V0B   | ATPase, H+ transporting, lysosomal 21kDa, V0 subunit b                  |           | Housekeeping |                                                 |                        |
| 199  | Male   | V-K+P-  | H82521   | ATP6V0B   | ATPase, H+ transporting, lysosomal 21kDa, V0 subunit b                  |           | Housekeeping |                                                 |                        |
| 200  | Male   | V+K+P+  | T85906   | BRD4      | Bromodomain containing 4                                                |           |              |                                                 |                        |
| 201  | Male   | V+K+P-  | AA039928 | C10orf128 | Chromosome 10 open reading frame 128                                    |           |              |                                                 |                        |
| 202  | Male   | V+K+P+  | W68477   | C1RL      | Complement component 1, r subcomponent-like                             |           |              |                                                 |                        |
| 203  | Male   | V-K+P+  | W24877   | C20orf77  | Chromosome 20 open reading frame 77                                     |           |              |                                                 |                        |
| 204  | Male   | V+K+P-  | BM790397 | C6orf125  | Chromosome 6 open reading frame 125                                     |           |              |                                                 |                        |
| 205  | Male   | V+K+P-  | R66945   | C9orf150  | Chromosome 9 open reading frame 150                                     |           |              |                                                 |                        |
| 206  | Male   | V+K+P-  | BI550180 | CALM2     |                                                                         |           |              |                                                 |                        |
| 207  | Male   | V+K+P-  | BM683235 | CD24      | CD24 molecule                                                           |           |              | Multiple sclerosis susceptibility to            | Immune                 |
| 208  | Male   | V-K+P-  | T87012   | CD79A     | CD79a molecule, immunoglobulin-associated alpha                         | HUB       |              |                                                 |                        |
| 209  | Male   | V-K+P-  | AA036972 | CDC40     | Cell division cycle 40 homolog (S. cerevisiae)                          |           |              |                                                 |                        |
| 210  | Male   | V+K+P-  | BM463991 | CDK5R1    | Cyclin-dependent kinase 5, regulatory subunit 1 (p35)                   | HUB       |              |                                                 |                        |
| 211  | Male   | V+K+P-  | BQ945970 | CDKN1C    | Cyclin-dependent kinase inhibitor 1C (p57, Kip2)                        |           |              | Beckwith-Wiedemann syndrome                     | Metabolic              |
| 212  | Male   | V+K+P-  | R55530   | CHI3L1    | Chitinase 3-like 1 (cartilage glycoprotein-39)                          |           |              |                                                 |                        |

| S.No | Gender | Profile | Acc      | Symbol | Name                                                                                      | HUB genes | Housekeeping | Disease_OMIM                                 | Disease_GAD                                                      |
|------|--------|---------|----------|--------|-------------------------------------------------------------------------------------------|-----------|--------------|----------------------------------------------|------------------------------------------------------------------|
| 213  | Male   | V-K+P-  | BE675690 | COX10  | COX10 homolog, cytochrome c oxidase assembly protein, heme A: farnesyltransferase (yeast) |           |              | Encephalopathy progressive mitochondrial     |                                                                  |
| 214  | Male   | V+K+P+  | BM717592 | CSH2   | Chorionic somatomammotropin hormone 2                                                     |           |              |                                              | Metabolic                                                        |
| 215  | Male   | V-K+P-  | W95228   | CTSG   | Cathepsin G                                                                               | HUB       |              |                                              | Cardiovascular,Neurological                                      |
| 216  | Male   | V-K+P+  | CD108783 | DDX5   | DEAD (Asp-Glu-Ala-Asp) box polypeptide 5                                                  | HUB       |              |                                              |                                                                  |
| 217  | Male   | V-K+P+  | N94809   | DPYD   | Dihydropyrimidine dehydrogenase                                                           |           |              | Thymine-uraciluria (3),Fluorouracil toxicity | Cancer,Developmental,Metabolic,Normal Variation,Pharmacogenomics |
| 218  | Male   | V+K+P+  | BG337015 | DUSP5  | Dual specificity phosphatase 5                                                            |           |              |                                              |                                                                  |
| 219  | Male   | V+K+P-  | H08650   | EGLN1  | Egl nine homolog 1 (C. elegans)                                                           |           |              |                                              |                                                                  |
| 220  | Male   | V+K+P-  | AA149511 | EGLN1  | Egl nine homolog 1 (C. elegans)                                                           |           |              |                                              |                                                                  |
| 221  | Male   | V-K+P+  | N43860   | EXOSC9 | Exosome component 9                                                                       | HUB       |              |                                              |                                                                  |

| S.No | Gender | Profile | Acc    | Symbol | Name                             | HUB genes | Housekeeping | Disease_OMIM                                                                                                                                                                                                                                                                                                                                                                                                                                                                              | Disease_GAD                                                          |
|------|--------|---------|--------|--------|----------------------------------|-----------|--------------|-------------------------------------------------------------------------------------------------------------------------------------------------------------------------------------------------------------------------------------------------------------------------------------------------------------------------------------------------------------------------------------------------------------------------------------------------------------------------------------------|----------------------------------------------------------------------|
| 222  | Male   | V+K-P+  | H71213 | F2     | Coagulation factor II (thrombin) | HUB       |              | BCG and salmonella infection disseminated, Bamforth-Lazarus syndrome, Bare lymphocyte syndrome type I due to TAP2 deficiency, Calcinosis tumoral, Charcot Marie-Tooth disease type 4B2, Chondrosarcoma, Chronic granulomatous disease due to deficiency of NCF-2, Complex V mitochondrial respiratory chain deficiency of, Coronary artery disease autosomal dominant 1, Diabetes mellitus noninsulin-dependent, Dysprothrombinemia (3), Fibromatosis gingival 2, Fibrosis of extraocular | Cancer,Cardiovascular**,Hematological,Immune,Metabolic,Reoroduction* |

| S.No | Gender | Profile | Acc      | Symbol   | Name                                                                 | HUB genes | Housekeeping | Disease_OMIM                                                                                                                                                                                                              | Disease_GAD                                                                        |
|------|--------|---------|----------|----------|----------------------------------------------------------------------|-----------|--------------|---------------------------------------------------------------------------------------------------------------------------------------------------------------------------------------------------------------------------|------------------------------------------------------------------------------------|
| 223  | Male   | V-K-P+  | AA031420 | FAS      | Fas (TNF receptor superfamily, member 6)                             | HUB       |              | Advanced sleep phase syndrome familial, AutoImmune lymphoproliferative syndrome type IA, Squamous cell carcinoma burn scar-related, AutoImmune lymphoproliferative syndrome), Systemic lupus erythematosus susceptibility | Aging,Cancer,Hematological,Immune***,Infection,Metabolic,Neurological,Reproduction |
| 224  | Male   | V+K-P-  | W55993   | FBN2     | Fibrillin 2 (congenital contractural arachnodactyly)                 |           |              | Contractural arachnodactyly                                                                                                                                                                                               | Cardiovascular,Developmental                                                       |
| 225  | Male   | V-K-P+  | H71637   | FCER1G   | Fc fragment of IgE, high affinity I, receptor for; gamma polypeptide |           |              |                                                                                                                                                                                                                           | Cardiovascular,Immune,Renal                                                        |
| 226  | Male   | V-K-P+  | W92270   | FCGR2A   | Fc fragment of IgG, low affinity IIa, receptor (CD32)                |           | Housekeeping | Lupus nephritis                                                                                                                                                                                                           | Cancer,Cardiovascular,Hematological,Immune***,Infection*,Neurological,Renal        |
| 227  | Male   | V-K+P+  | T87708   | FGL2     | Fibrinogen-like 2                                                    |           |              |                                                                                                                                                                                                                           | Immune                                                                             |
| 228  | Male   | V-K+P+  | BM998060 | FGL2     | Fibrinogen-like 2                                                    |           |              |                                                                                                                                                                                                                           | Immune                                                                             |
| 229  | Male   | V+K-P-  | AA046539 | FLJ20186 | Hypothetical protein FLJ20186                                        |           |              |                                                                                                                                                                                                                           |                                                                                    |
| 230  | Male   | V-K+P-  | T90037   | FLJ20273 | RNA-binding protein                                                  |           |              |                                                                                                                                                                                                                           |                                                                                    |
| 231  | Male   | V-K+P-  | N48346   | FNIP1    | Folliculin interacting protein 1                                     |           |              |                                                                                                                                                                                                                           |                                                                                    |
| 232  | Male   | V-K+P+  | AA149521 | FOXP3    | Forkhead box N3                                                      |           |              |                                                                                                                                                                                                                           |                                                                                    |
| 233  | Male   | V-K+P+  | BM852433 | FTL      | Ferritin, light polypeptide                                          | HUB       |              | Basal ganglia disease adult-onset, Epilepsy, Hyperferritinemia-cataract syndrome                                                                                                                                          | Neurological                                                                       |

| S.No | Gender | Profile | Acc      | Symbol  | Name                                           | HUB genes | Housekeeping | Disease_OMIM                                                                                                                              | Disease_GAD                       |
|------|--------|---------|----------|---------|------------------------------------------------|-----------|--------------|-------------------------------------------------------------------------------------------------------------------------------------------|-----------------------------------|
| 234  | Male   | V-K+P+  | BQ130731 | FTL     | Ferritin, light polypeptide                    | HUB       |              | Basal ganglia disease adult-onset, Epilepsy, Hyperferritinemia-cataract syndrome                                                          | Neurological                      |
| 235  | Male   | V+K-P-  | N44024   | FZD7    | Frizzled homolog 7 (Drosophila)                |           |              |                                                                                                                                           |                                   |
| 236  | Male   | V+K-P-  | BM999387 | GADD45A | Growth arrest and DNA-damage-inducible, alpha  | HUB       |              |                                                                                                                                           |                                   |
| 237  | Male   | V-K+P+  | W52609   | GLRX    | Glutaredoxin (thioltransferase)                |           |              |                                                                                                                                           |                                   |
| 238  | Male   | V-K+P+  | N46532   | GPR177  | G protein-coupled receptor 177                 |           |              |                                                                                                                                           |                                   |
| 239  | Male   | V+K+P-  | BM725539 | GRHPR   | Glyoxylate reductase/hydroxypyruvate reductase |           |              | Hyperoxaluria primary type II                                                                                                             |                                   |
| 240  | Male   | V-K-P+  | BQ128382 | HBA1    | Hemoglobin, alpha 1                            |           |              | Erythremias, Heinz body anemias, Methemoglobinemias, Thalassemias                                                                         | Hematological,Immune,Infection    |
| 241  | Male   | V-K-P+  | BQ130241 | HBA1    | Hemoglobin, alpha 1                            |           |              | Erythremias, Heinz body anemias, Methemoglobinemias, Thalassemias                                                                         | Hematological,Immune,Infection    |
| 242  | Male   | V+K-P+  | BQ028891 | HBB     | Hemoglobin, beta                               |           |              | Erythremias, HPFH, Heinz body anemias, Methemoglobinemias, Sickle cell anemia (3), Thalassemia-beta dominant inclusion-body, Thalassemias | Hematological,Infection,Metabolic |

| S.No | Gender | Profile | Acc      | Symbol     | Name                                         | HUB genes | Housekeeping | Disease_OMIM                                                                                                                              | Disease_GAD                                           |
|------|--------|---------|----------|------------|----------------------------------------------|-----------|--------------|-------------------------------------------------------------------------------------------------------------------------------------------|-------------------------------------------------------|
| 243  | Male   | V+K-P+  | BQ028891 | HBB        | Hemoglobin, beta                             |           |              | Erythremias, HPFH, Heinz body anemias, Methemoglobinemias, Sickle cell anemia (3), Thalassemia-beta dominant inclusion-body, Thalassemias | Hematological,Infection,Metabolic                     |
| 244  | Male   | V+K-P+  | H12367   | HBB        | Hemoglobin, beta                             |           |              | Erythremias, HPFH, Heinz body anemias, Methemoglobinemias, Sickle cell anemia (3), Thalassemia-beta dominant inclusion-body, Thalassemias | Hematological,Infection,Metabolic                     |
| 245  | Male   | V+K-P+  | BM996267 | HBB        | Hemoglobin, beta                             |           |              | Erythremias, HPFH, Heinz body anemias, Methemoglobinemias, Sickle cell anemia (3), Thalassemia-beta dominant inclusion-body, Thalassemias | Hematological,Infection,Metabolic                     |
| 246  | Male   | V+K-P-  | R77671   | hCG_164649 | Brother of ataxin-1                          |           |              |                                                                                                                                           |                                                       |
| 247  | Male   | V+K-P+  | BM842766 | HIATL1     | Hippocampus abundant transcript-like 1       |           |              |                                                                                                                                           |                                                       |
| 248  | Male   | V+K-P+  | W38744   | HIPK3      | Homeodomain interacting protein kinase 3     | HUB       |              |                                                                                                                                           |                                                       |
| 249  | Male   | V+K-P-  | H27034   | HLA-C      | Major histocompatibility complex, class I, C | HUB       |              |                                                                                                                                           | Cancer,Hematological,Immune**,Infection*,Reproduction |
| 250  | Male   | V+K-P-  | H44273   | HLA-C      | Major histocompatibility complex, class I, C | HUB       |              |                                                                                                                                           | Cancer,Hematological,Immune**,Infection*,Reproduction |

| S.No | Gender | Profile | Acc      | Symbol   | Name                                                            | HUB genes | Housekeeping | Disease_OMIM                                                                          | Disease_GAD                                                                                                                                    |
|------|--------|---------|----------|----------|-----------------------------------------------------------------|-----------|--------------|---------------------------------------------------------------------------------------|------------------------------------------------------------------------------------------------------------------------------------------------|
| 251  | Male   | V-K-P+  | H25099   | HLA-DQA1 | Major histocompatibility complex, class II, DQ alpha 1          |           |              |                                                                                       | Cancer*,Cardiovascular,Developmental,Immune****,Infection*,Metabolic*,Neurological,Normal Variation,Psychiatric,Renal,Reoroduction             |
| 252  | Male   | V+K-P+  | AA029822 | HLA-DQB1 | Major histocompatibility complex, class II, DQ beta 1           |           |              | Creutzfeldt-Jakob disease variant resistance to, Multiple sclerosis susceptibility to | Cancer**,Cardiovascular,Hematological,Immune****,Infection***,Metabolic*,Neurological,Normal Variation,Psychiatric*,Renal,Reoroduction*,Vision |
| 253  | Male   | V-K+P-  | AA149393 | HPRT1    | Hypoxanthine phosphoribosyltransferase 1 (Lesch-Nyhan syndrome) |           |              | HPRT-related gout, Lesch-Nyhan syndrome                                               | Cancer,Chemical Dependency,Metabolic                                                                                                           |
| 254  | Male   | V-K+P-  | H30789   | HSPC148  | Hypothetical protein HSPC148                                    |           |              |                                                                                       |                                                                                                                                                |
| 255  | Male   | V+K-P-  | R73278   | ICAM3    | Intercellular adhesion molecule 3                               |           |              |                                                                                       |                                                                                                                                                |
| 256  | Male   | V-K-P+  | N63988   | IFIT2    | Interferon-induced protein with tetratricopeptide repeats 2     |           |              |                                                                                       |                                                                                                                                                |
| 257  | Male   | V+K-P+  | H49853   | IFITM1   | Interferon induced transmembrane protein 1 (9-27)               |           | Housekeeping |                                                                                       |                                                                                                                                                |
| 258  | Male   | V-K+P+  | T96831   | IFNAR1   | Interferon (alpha, beta and omega) receptor 1                   | HUB       |              |                                                                                       | Immune,Infection,Metabolic,Psychiatric                                                                                                         |
| 259  | Male   | V+K-P+  | H84616   | IGF1R    | Insulin-like growth factor 1 receptor                           | HUB       |              | Intrauterine and postnatal growth retardation (3)                                     | Aging,Cardiovascular,Metabolic,Reoroduction                                                                                                    |
| 260  | Male   | V+K-P-  | H27044   | IGHA1    | Immunoglobulin heavy constant alpha 1                           |           |              |                                                                                       |                                                                                                                                                |
| 261  | Male   | V+K+P-  | R79618   | IGHA1    | Immunoglobulin heavy constant alpha 1                           |           |              |                                                                                       |                                                                                                                                                |
| 262  | Male   | V+K+P-  | H45128   | IGHA1    | Immunoglobulin heavy constant alpha 1                           |           |              |                                                                                       |                                                                                                                                                |
| 263  | Male   | V+K-P-  | H52350   | IGHG1    | Immunoglobulin heavy constant gamma 1 (G1m marker)              |           |              |                                                                                       | Immune                                                                                                                                         |
| 264  | Male   | V+K-P-  | H45793   | IGHG1    | Immunoglobulin heavy constant gamma 1 (G1m marker)              |           |              |                                                                                       | Immune                                                                                                                                         |
| 265  | Male   | V+K-P-  | AI146644 | IGHG1    | Immunoglobulin heavy constant gamma 1 (G1m marker)              |           |              |                                                                                       | Immune                                                                                                                                         |
| 266  | Male   | V+K-P-  | R86079   | IGL@     | Immunoglobulin lambda locus                                     |           |              |                                                                                       |                                                                                                                                                |
| 267  | Male   | V+K+P-  | R49901   | IGL@     | Immunoglobulin lambda locus                                     |           |              |                                                                                       |                                                                                                                                                |



| S.No | Gender | Profile | Acc      | Symbol   | Name                                                         | HUB genes | Housekeeping | Disease_OMIM       | Disease_GAD |
|------|--------|---------|----------|----------|--------------------------------------------------------------|-----------|--------------|--------------------|-------------|
| 268  | Male   | V+K-P-  | R49901   | IGL@     | Immunoglobulin lambda locus                                  |           |              |                    |             |
| 269  | Male   | V+K-P-  | H26788   | IGL@     | Immunoglobulin lambda locus                                  |           |              |                    |             |
| 270  | Male   | V-K-P+  | W37552   | IL11RA   | Interleukin 11 receptor, alpha                               |           |              |                    | Immune      |
| 271  | Male   | V+K-P+  | R52482   | IMPA2    | Inositol(myo)-1(or 4)-monophosphatase 2                      |           |              |                    | Psychiatric |
| 272  | Male   | V-K+P-  | AA115289 | KALRN    | Kalirin, RhoGEF kinase                                       |           |              |                    |             |
| 273  | Male   | V-K+P-  | CA488240 | KCNG1    | Potassium voltage-gated channel, subfamily G, member 1       |           |              |                    |             |
| 274  | Male   | V+K-P+  | W38679   | KCNJ2    | Potassium inwardly-rectifying channel, subfamily J, member 2 | HUB       |              | Long QT syndrome-7 |             |
| 275  | Male   | V-K-P+  | BM806879 | KCNJ2    | Potassium inwardly-rectifying channel, subfamily J, member 2 | HUB       |              | Long QT syndrome-7 |             |
| 276  | Male   | V+K-P+  | W38679   | KCNJ2    | Potassium inwardly-rectifying channel, subfamily J, member 2 | HUB       |              | Long QT syndrome-7 |             |
| 277  | Male   | V-K+P+  | AI951455 | KIAA0040 | KIAA0040                                                     |           |              |                    |             |
| 278  | Male   | V-K+P-  | R60601   | KIAA0372 | KIAA0372                                                     |           |              |                    |             |

| S.No | Gender | Profile | Acc      | Symbol    | Name                                       | HUB genes | Housekeeping | Disease_OMIM                                                                                                                                                                                                                                                                                                                                                                                                                                                                                                                 | Disease_GAD |
|------|--------|---------|----------|-----------|--------------------------------------------|-----------|--------------|------------------------------------------------------------------------------------------------------------------------------------------------------------------------------------------------------------------------------------------------------------------------------------------------------------------------------------------------------------------------------------------------------------------------------------------------------------------------------------------------------------------------------|-------------|
| 279  | Male   | V+K-P+  | AA024415 | KRT1      | Keratin 1 (epidermolytic hyperkeratosis)   |           |              | Cirrhosis, Cyclic ichthyosis with epidermolytic hyperkeratosis, Epidermolysis bullosa simplex Koebner Dowling-Meara and Weber-Cockayne types, Epidermolysis bullosa simplex recessive, Epidermolytic hyperkeratosis, Epidermolytic hyperkeratosis, Ichthyosis histrix Curth-Macklin type, Ichthyosis cyclic with epidermolytic hyperkeratosis, Keratosis palmoplantaria striata, Keratosis palmoplantaris striata III, Meesmann corneal dystrophy, Nevus epidermal epidermolytic hyperkeratotic type, Pachyonychia congenita |             |
| 280  | Male   | V-K+P-  | H95300   | LCP1      | Lymphocyte cytosolic protein 1 (L-plastin) |           |              |                                                                                                                                                                                                                                                                                                                                                                                                                                                                                                                              |             |
| 281  | Male   | V-K+P-  | AA203281 | LDHD      | Lactate dehydrogenase D                    |           |              |                                                                                                                                                                                                                                                                                                                                                                                                                                                                                                                              |             |
| 282  | Male   | V+K+P-  | R61021   | LOC145899 | Hypothetical protein LOC145899             |           |              |                                                                                                                                                                                                                                                                                                                                                                                                                                                                                                                              |             |
| 283  | Male   | V+K-P+  | R16402   | LOC197135 | Hypothetical LOC197135                     |           |              |                                                                                                                                                                                                                                                                                                                                                                                                                                                                                                                              |             |
| 284  | Male   | V+K-P+  | H87076   | LOC401152 | HCV F-transactivated protein 1             |           |              |                                                                                                                                                                                                                                                                                                                                                                                                                                                                                                                              |             |
| 285  | Male   | V+K-P+  | BQ021273 | MEMO1     | Mediator of cell motility 1                |           |              |                                                                                                                                                                                                                                                                                                                                                                                                                                                                                                                              |             |

| S.No | Gender | Profile | Acc      | Symbol   | Name                                                                               | HUB genes | Housekeeping | Disease_OMIM                 | Disease_GAD |
|------|--------|---------|----------|----------|------------------------------------------------------------------------------------|-----------|--------------|------------------------------|-------------|
| 286  | Male   | V+K-P-  | W81346   | MGAT1    |                                                                                    |           | Housekeeping |                              |             |
| 287  | Male   | V+K-P+  | H47934   | MGC12760 | Hypothetical protein MGC12760                                                      |           |              |                              |             |
| 288  | Male   | V-K+P-  | AA063134 | MGC27345 | Hypothetical protein MGC27345                                                      |           |              |                              |             |
| 289  | Male   | V-K+P+  | AA213820 | MGC52498 | Hypothetical protein MGC52498                                                      |           |              |                              |             |
| 290  | Male   | V-K-P+  | N22335   | MITD1    | MIT, microtubule interacting and transport, domain containing 1                    |           |              | 7974 Leukemia                |             |
| 291  | Male   | V-K+P+  | AI522083 | MLL      | Myeloid/lymphoid or mixed-lineage leukemia (trithorax homolog, Drosophila)         | HUB       |              |                              | Cancer      |
| 292  | Male   | V-K+P+  | R77519   | MNDA     | Myeloid cell nuclear differentiation antigen                                       |           |              |                              |             |
| 293  | Male   | V-K+P+  | BM799719 | MRPL35   | Mitochondrial ribosomal protein L35                                                |           |              |                              |             |
| 294  | Male   | V+K-P+  | R69774   | MUC15    | Mucin 15, cell surface associated                                                  |           |              |                              |             |
| 295  | Male   | V+K-P-  | AA099821 | MYADM    | Myeloid-associated differentiation marker                                          |           |              |                              |             |
| 296  | Male   | V+K-P-  | H06796   | MYLIP    | Myosin regulatory light chain interacting protein                                  |           |              |                              |             |
| 297  | Male   | V+K-P+  | H06796   | MYLIP    | Myosin regulatory light chain interacting protein                                  |           |              |                              |             |
| 298  | Male   | V+K+P-  | T97240   | MYO5C    | Myosin VC                                                                          |           |              |                              |             |
| 299  | Male   | V+K-P+  | R67302   | NBEA     | Neurobeachin                                                                       |           |              |                              |             |
| 300  | Male   | V+K+P-  | AL527869 | NCAPG2   | Non-SMC condensin II complex, subunit G2                                           |           |              |                              |             |
| 301  | Male   | V+K-P-  | R25036   | NDST1    | N-deacetylase/N-sulfotransferase (heparan glucosaminyl) 1                          |           |              |                              |             |
| 302  | Male   | V+K-P-  | BQ054257 | NDUFA11  | NADH dehydrogenase (ubiquinone) 1 alpha subcomplex, 11, 14.7kDa                    |           |              |                              |             |
| 303  | Male   | V-K+P+  | H70961   | NFKBIZ   | Nuclear factor of kappa light polypeptide gene enhancer in B-cells inhibitor, zeta |           |              |                              |             |
| 304  | Male   | V-K+P+  | N34884   | NIF3L1   | NIF3 NGG1 interacting factor 3-like 1 (S. pombe)                                   | HUB       |              |                              |             |
| 305  | Male   | V-K-P+  | H88805   | NOV      | Nephroblastoma overexpressed gene                                                  | HUB       |              | Niemann-pick disease type C2 |             |
| 306  | Male   | V+K-P+  | BQ128229 | NPC2     | Niemann-Pick disease, type C2                                                      |           |              |                              |             |
| 307  | Male   | V+K+P-  | AL525867 | NPL      | N-acetylneuraminate pyruvate lyase (dihydrodipicolinate synthase)                  |           |              |                              |             |

| S.No | Gender | Profile | Acc      | Symbol   | Name                                                                                  | HUB genes | Housekeeping | Disease_OMIM                                         | Disease_GAD                                                                    |
|------|--------|---------|----------|----------|---------------------------------------------------------------------------------------|-----------|--------------|------------------------------------------------------|--------------------------------------------------------------------------------|
| 308  | Male   | V+K-P+  | AW138141 | NRM      | Nurim (nuclear envelope membrane protein)                                             |           |              |                                                      |                                                                                |
| 309  | Male   | V+K-P+  | R69654   | OSBPL3   | Oxysterol binding protein-like 3                                                      |           |              |                                                      |                                                                                |
| 310  | Male   | V+K-P+  | R23871   | PCBP1    | Poly(rC) binding protein 1                                                            | HUB       |              |                                                      |                                                                                |
| 311  | Male   | V+K+P-  | W32160   | PCDHA6   | Protocadherin alpha 6                                                                 |           |              | Zellweger syndrome                                   |                                                                                |
| 312  | Male   | V+K-P+  | R76845   | PEX14    | Peroxisomal biogenesis factor 14                                                      |           |              |                                                      |                                                                                |
| 313  | Male   | V+K-P+  | W19988   | PFAAP5   | Phosphonoformate immuno-associated protein 5                                          |           |              |                                                      |                                                                                |
| 314  | Male   | V-K-P+  | AA131389 | PHACTR4  | Phosphatase and actin regulator 4                                                     |           |              |                                                      |                                                                                |
| 315  | Male   | V-K+P+  | R02688   | PHF21A   | PHD finger protein 21A                                                                |           |              | Polycystic kidney disease adult                      |                                                                                |
| 316  | Male   | V+K-P+  | W24775   | PKD2     | Polycystic kidney disease 2 (autosomal dominant)                                      |           |              |                                                      | Renal                                                                          |
| 317  | Male   | V+K-P-  | BQ002836 | PLXNB2   | Plexin B2                                                                             |           |              |                                                      |                                                                                |
| 318  | Male   | V+K-P+  | BG763627 | PNPLA6   | Patatin-like phospholipase domain containing 6                                        |           |              |                                                      |                                                                                |
| 319  | Male   | V+K-P+  | W78000   | POMZP3   | POM (POM121 homolog, rat) and ZP3 fusion                                              |           |              |                                                      |                                                                                |
| 320  | Male   | V-K+P+  | R80587   | PPP2R2A  | Protein phosphatase 2 (formerly 2A), regulatory subunit B, alpha isoform              |           |              |                                                      |                                                                                |
| 321  | Male   | V-K+P-  | N92208   | PPP4R2   | Protein phosphatase 4, regulatory subunit 2                                           |           |              |                                                      |                                                                                |
| 322  | Male   | V+K+P-  | AA018979 | PRKACB   | Protein kinase, cAMP-dependent, catalytic, beta                                       |           |              |                                                      |                                                                                |
| 323  | Male   | V+K+P-  | AA128571 | PRKCH    | Protein kinase C, eta                                                                 |           |              |                                                      |                                                                                |
| 324  | Male   | V+K-P+  | R99962   | PTGS1    | Prostaglandin-endoperoxide synthase 1 (prostaglandin G/H synthase and cyclooxygenase) |           |              |                                                      | Cancer,Cardiovascular,Immune,Psychiatric                                       |
| 325  | Male   | V-K+P+  | R80322   | PTGS2    | Prostaglandin-endoperoxide synthase 2 (prostaglandin G/H synthase and cyclooxygenase) |           |              |                                                      | Cancer*,Cardiovascular,Hematological,Immune,Metabolic,Neurological,Psychiatric |
| 326  | Male   | V-K+P-  | AL575253 | PVRL2    | Poliovirus receptor-related 2 (herpesvirus entry mediator B)                          |           |              |                                                      | Cardiovascular                                                                 |
| 327  | Male   | V+K+P-  | N54827   | RABGAP1L | RAB GTPase activating protein 1-like                                                  |           |              | Osteolysis familial expansile, Paget disease of bone |                                                                                |

| S.No | Gender | Profile | Acc      | Symbol  | Name                                                       | HUB genes | Housekeeping | Disease_OMIM                                                                                                                                                                            | Disease_GAD |
|------|--------|---------|----------|---------|------------------------------------------------------------|-----------|--------------|-----------------------------------------------------------------------------------------------------------------------------------------------------------------------------------------|-------------|
| 328  | Male   | V-K+P-  | BQ070782 | RAN     | RAN, member RAS oncogene family                            | HUB       | Housekeeping |                                                                                                                                                                                         |             |
| 329  | Male   | V-K-P+  | T84264   | RAP2B   | RAP2B, member of RAS oncogene family                       |           |              |                                                                                                                                                                                         |             |
| 330  | Male   | V+K+P-  | BE551027 | RAPGEF2 | Rap guanine nucleotide exchange factor (GEF) 2             |           |              |                                                                                                                                                                                         |             |
| 331  | Male   | V-K+P-  | AI500475 | RASGRP1 | RAS guanyl releasing protein 1 (calcium and DAG-regulated) |           |              | Cone-rod dystrophy 3, Fundus flavimaculatus, Macular degeneration age-related 2, Retinitis pigmentosa-19, Stargardt disease-1, Schizophrenia                                            |             |
| 332  | Male   | V+K-P-  | H93740   | RD3     | Retinal degeneration 3                                     |           |              |                                                                                                                                                                                         |             |
| 333  | Male   | V-K+P-  | R60831   | RGMB    | RGM domain family, member B                                |           |              |                                                                                                                                                                                         |             |
| 334  | Male   | V+K+P-  | N77152   | RGS18   | Regulator of G-protein signalling 18                       |           |              |                                                                                                                                                                                         |             |
| 335  | Male   | V+K+P-  | AA195206 | RGS18   | Regulator of G-protein signalling 18                       |           |              | Cavernous malformations of CNS and retina, Cerebral cavernous malformations-1, Hyperkeratotic cutaneous capillary-venous malformations associated with cerebral capillary malformations |             |
| 336  | Male   | V+K+P-  | AA055094 | RIT1    | Ras-like without CAAX 1                                    | HUB       |              |                                                                                                                                                                                         |             |
| 337  | Male   | V+K-P-  | R13557   | RPA2    | Replication protein A2, 32kDa                              | HUB       | Housekeeping |                                                                                                                                                                                         |             |
| 338  | Male   | V+K-P+  | R72766   | RPS15   | Ribosomal protein S15                                      |           | Housekeeping |                                                                                                                                                                                         |             |
| 339  | Male   | V-K+P-  | AA534515 | RPS3A   | Ribosomal protein S3A                                      | HUB       |              |                                                                                                                                                                                         |             |
| 340  | Male   | V+K-P-  | BQ073203 | S100A10 | S100 calcium binding protein A10                           | HUB       |              |                                                                                                                                                                                         |             |

| S.No | Gender | Profile | Acc      | Symbol     | Name                                                                                                         | HUB genes | Housekeeping | Disease_OMIM                                                              | Disease_GAD                                                                                   |
|------|--------|---------|----------|------------|--------------------------------------------------------------------------------------------------------------|-----------|--------------|---------------------------------------------------------------------------|-----------------------------------------------------------------------------------------------|
| 341  | Male   | V-K+P-  | R62721   | SCYE1      | Small inducible cytokine subfamily E, member 1 (endothelial monocyte-activating)                             |           |              |                                                                           |                                                                                               |
| 342  | Male   | V+K+P-  | W37168   | SFRS2      | Splicing factor, arginine/serine-rich 2                                                                      | HUB       | Housekeeping |                                                                           |                                                                                               |
| 343  | Male   | V+K-P-  | N49623   | SMAP1L     | Stromal membrane-associated protein 1-like                                                                   |           |              |                                                                           |                                                                                               |
| 344  | Male   | V+K+P-  | H43425   | SNX12      | Sorting nexin 12                                                                                             |           |              |                                                                           |                                                                                               |
| 345  | Male   | V+K-P-  | BG942204 | SON        | SON DNA binding protein                                                                                      |           |              |                                                                           |                                                                                               |
| 346  | Male   | V+K-P-  | AA193339 | SRRM1      | Serine/arginine repetitive matrix 1                                                                          |           | Housekeeping |                                                                           |                                                                                               |
| 347  | Male   | V+K-P+  | R88696   | ST6GALNAC4 | ST6 (alpha-N-acetyl-neuraminy-2,3-beta-galactosyl-1,3)-N-acetylgalactosaminide alpha-2,6-sialyltransferase 4 |           |              | hormone insensitivity with immunodeficiency, Leukemia acute promyelocytic |                                                                                               |
| 348  | Male   | V-K-P+  | BI520110 | STAT5B     | Signal transducer and activator of transcription 5B                                                          | HUB       |              |                                                                           |                                                                                               |
| 349  | Male   | V-K+P+  | N67807   | STK16      | Serine/threonine kinase 16                                                                                   |           |              |                                                                           |                                                                                               |
| 350  | Male   | V+K-P-  | R63027   | STK40      | Serine/threonine kinase 40                                                                                   |           |              |                                                                           |                                                                                               |
| 351  | Male   | V-K+P+  | R59251   | SUV39H1    | Suppressor of variegation 3-9 homolog 1 (Drosophila)                                                         | HUB       |              |                                                                           |                                                                                               |
| 352  | Male   | V+K-P+  | AA156587 | SYNC1      | Syncoilin, intermediate filament 1                                                                           |           |              | Transaldolase deficiency                                                  |                                                                                               |
| 353  | Male   | V-K+P+  | N24276   | TALDO1     | Transaldolase 1                                                                                              |           | Housekeeping |                                                                           |                                                                                               |
| 354  | Male   | V+K-P+  | R73296   | TBC1D17    | TBC1 domain family, member 17                                                                                | HUB       |              |                                                                           |                                                                                               |
| 355  | Male   | V+K+P-  | AA045267 | TIE1       | Tyrosine kinase with immunoglobulin-like and EGF-like domains 1                                              |           |              | Endotoxin hyporesponsiveness (3)                                          |                                                                                               |
| 356  | Male   | V-K+P+  | N42522   | TLR4       | Toll-like receptor 4                                                                                         | HUB       |              |                                                                           | Cancer, Cardiovascular*, Immune**, Infection**, Metabolic, Neurological, Reproduction, Vision |
| 357  | Male   | V-K+P+  | N49034   | TMEM66     | Transmembrane protein 66                                                                                     |           |              |                                                                           |                                                                                               |
| 358  | Male   | V-K-P+  | R16934   | TNFSF13B   | Tumor necrosis factor (ligand) superfamily, member 13b                                                       |           |              |                                                                           | Immune                                                                                        |
| 359  | Male   | V-K+P+  | R16934   | TNFSF13B   | Tumor necrosis factor (ligand) superfamily, member 13b                                                       |           |              |                                                                           | Immune                                                                                        |
| 360  | Male   | V-K+P-  | R23917   | TREX1      | Three prime repair exonuclease 1                                                                             |           |              |                                                                           |                                                                                               |
| 361  | Male   | V-K+P+  | R14194   | TRIM66     | Tripartite motif-containing 66                                                                               |           |              |                                                                           |                                                                                               |

| S.No | Gender | Profile | Acc      | Symbol      | Name                                                     | HUB genes | Housekeeping | Disease_OMIM | Disease_GAD |
|------|--------|---------|----------|-------------|----------------------------------------------------------|-----------|--------------|--------------|-------------|
| 362  | Male   | V+K-P+  | H08988   | USP7        | Ubiquitin specific peptidase 7 (herpes virus-associated) | HUB       |              |              |             |
| 363  | Male   | V+K-P+  | AW965088 | ZKSCAN2     | Zinc finger with KRAB and SCAN domains 2                 |           |              |              |             |
| 364  | Male   | V+K+P-  | W58007   | ZNF516      | Zinc finger protein 516                                  |           |              |              |             |
| 365  | Male   | V+K-P+  | BX098130 | unannotated |                                                          |           |              |              |             |
| 366  | Male   | V+K-P+  | R97949   | unannotated |                                                          |           |              |              |             |
| 367  | Male   | V-K+P-  | AA213450 | unannotated |                                                          |           |              |              |             |
| 368  | Male   | V+K+P-  | H39539   | unannotated |                                                          |           |              |              |             |
| 369  | Male   | V+K+P-  | BM837817 | unannotated |                                                          |           |              |              |             |
| 370  | Male   | V+K+P-  | N92095   | unannotated |                                                          |           |              |              |             |
| 371  | Male   | V-K+P-  | AA021582 | unannotated |                                                          |           |              |              |             |
| 372  | Male   | V-K+P-  | R26331   | unannotated |                                                          |           |              |              |             |
| 373  | Male   | V-K+P+  | AA055986 | unannotated |                                                          |           |              |              |             |
| 374  | Male   | V-K+P-  | R06606   | unannotated |                                                          |           |              |              |             |
| 375  | Male   | V+K+P-  | R06500   | unannotated |                                                          |           |              |              |             |
| 376  | Male   | V+K-P+  | H52273   | unannotated |                                                          |           |              |              |             |
| 377  | Male   | V-K+P-  | AV711358 | unannotated |                                                          |           |              |              |             |
| 378  | Male   | V+K-P+  | R34503   | unannotated |                                                          |           |              |              |             |
| 379  | Male   | V+K+P-  | R55451   | unannotated |                                                          |           |              |              |             |
| 380  | Male   | V-K+P+  | N63789   | unannotated |                                                          |           |              |              |             |
| 381  | Male   | V+K-P-  | R20110   | unannotated |                                                          |           |              |              |             |
| 382  | Male   | V+K-P+  | R20974   | unannotated |                                                          |           |              |              |             |
| 383  | Male   | V-K+P+  | R83560   | unannotated |                                                          |           |              |              |             |
| 384  | Male   | V+K-P-  | R55451   | unannotated |                                                          |           |              |              |             |
| 385  | Male   | V-K+P+  | H86049   | unannotated |                                                          |           |              |              |             |
| 386  | Male   | V+K-P-  | W78898   | unannotated |                                                          |           |              |              |             |
| 387  | Male   | V-K+P+  | T93598   | unannotated |                                                          |           |              |              |             |
| 388  | Male   | V+K-P+  | T83917   | unannotated |                                                          |           |              |              |             |
| 389  | Male   | V+K-P+  | T86264   | unannotated |                                                          |           |              |              |             |
| 390  | Male   | V+K-P+  | R84397   | unannotated |                                                          |           |              |              |             |
| 391  | Male   | V+K-P+  | R09976   | unannotated |                                                          |           |              |              |             |
| 392  | Male   | V+K-P-  | R87739   | unannotated |                                                          |           |              |              |             |
| 393  | Male   | V+K-P-  | T85855   | unannotated |                                                          |           |              |              |             |
| 394  | Male   | V+K-P+  | H02366   | unannotated |                                                          |           |              |              |             |
| 395  | Male   | V+K-P+  | R59360   | unannotated |                                                          |           |              |              |             |
| 396  | Male   | V+K-P+  | R97958   | unannotated |                                                          |           |              |              |             |
| 397  | Male   | V-K-P+  | T80910   | unannotated |                                                          |           |              |              |             |
| 398  | Male   | V+K-P-  | N92185   | unannotated |                                                          |           |              |              |             |
| 399  | Male   | V-K-P+  | R91270   | unannotated |                                                          |           |              |              |             |

| S.No | Gender | Profile | Acc      | Symbol      | Name | HUB genes | Housekeeping | Disease_OMIM | Disease_GAD |
|------|--------|---------|----------|-------------|------|-----------|--------------|--------------|-------------|
| 400  | Male   | V+K-P+  | T96870   | unannotated |      |           |              |              |             |
| 401  | Male   | V-K+P+  | H12953   | unannotated |      |           |              |              |             |
| 402  | Male   | V+K+P-  | H62088   | unannotated |      |           |              |              |             |
| 403  | Male   | V+K-P+  | T82117   | unannotated |      |           |              |              |             |
| 404  | Male   | V+K-P+  | T98701   | unannotated |      |           |              |              |             |
| 405  | Male   | V+K-P+  | AA147561 | unannotated |      |           |              |              |             |
| 406  | Male   | V+K-P+  | R79487   | unannotated |      |           |              |              |             |
| 407  | Male   | V+K-P+  | T91738   | unannotated |      |           |              |              |             |
| 408  | Male   | V+K+P-  | N43942   | unannotated |      |           |              |              |             |
| 409  | Male   | V+K-P-  | AA203276 | unannotated |      |           |              |              |             |
| 410  | Male   | V+K-P+  | H51271   | unannotated |      |           |              |              |             |
| 411  | Male   | V+K-P+  | T94951   | unannotated |      |           |              |              |             |
| 412  | Male   | V+K-P+  | H48738   | unannotated |      |           |              |              |             |
| 413  | Male   | V+K+P-  | N68486   | unannotated |      |           |              |              |             |
| 414  | Male   | V+K-P+  | R41373   | unannotated |      |           |              |              |             |
| 415  | Male   | V+K-P+  | N66410   | unannotated |      |           |              |              |             |
| 416  | Male   | V+K-P-  | T77494   | unannotated |      |           |              |              |             |
| 417  | Male   | V-K-P+  | H89240   | unannotated |      |           |              |              |             |
| 418  | Male   | V+K-P+  | T85771   | unannotated |      |           |              |              |             |
| 419  | Male   | V-K+P-  | R11282   | unannotated |      |           |              |              |             |
| 420  | Male   | V+K-P+  | R05895   | unannotated |      |           |              |              |             |
| 421  | Male   | V+K-P+  | AA099171 | unannotated |      |           |              |              |             |
| 422  | Male   | V+K-P-  | R19725   | unannotated |      |           |              |              |             |
| 423  | Male   | V+K-P+  | R13857   | unannotated |      |           |              |              |             |
| 424  | Male   | V+K-P+  | R78322   | unannotated |      |           |              |              |             |
| 425  | Male   | V-K-P+  | BQ049843 | unannotated |      |           |              |              |             |
| 426  | Male   | V+K-P+  | H51850   | unannotated |      |           |              |              |             |
| 427  | Male   | V-K+P-  | H61972   | unannotated |      |           |              |              |             |
| 428  | Male   | V+K-P-  | AA058635 | unannotated |      |           |              |              |             |
